# Supplementary material
Source: Springer Nature journal article supplement (https://www.springermedizin.de/resource/supplementary/12877_2008_117_MOESM1_ESM.pdf/9441210)
Supplement: MOESM1 [file 9441210]

**Did you need to go to hospital after your fall?**

**YES**     **NO**

- a) If yes, how did you get to hospital?
- b) If you did go to hospital following the fall, were you admitted overnight?
- c) If yes, how many nights did you stay in hospital?

**Please indicate if you needed to use any of the following out-of-hospital health services following your fall:**

- i) General Practitioner
- ii) Parkinson disease Specialist
- iii) Physiotherapist
- iv) Other allied Health Professional
- v) Radiology (XRay Clinic)
- vi) Pathology Clinic
